# Supplementary material for: Reviews Left and Right: The Link Between Reviewers’ Political Ideology and Online Review Language
Source: Springer Nature journal article supplement (doi:10.1007/s12599-020-00652-1), 2020-05-28
Supplement: MOESM1 [file 18028062]

# **Reviews Left and Right: The Link Between Reviewers' Political Ideology and Online Review Language**

**Lorenz Graf-Vlachy, Tarun Goyal, Yannick Ouardi, Andreas König**

Business & Information Systems Engineering (2020)

**Appendix (available online via <http://link.springer.com>)**

## Online Appendix

| Consequence        | Exemplary research on associated review properties                                                                                                                                                                                                                                                                                                                                                                                                                                                                                                                                                                                                                                                                                                                                                                                                                                                                                                                                                                                                                                                                                                                                                                                                                                                                                                                                                                                                                                                                                                                                                                                                                                                                                                                                                                                                                                                                                                                                                                                                                                                                                                                                                                            |
|--------------------|-------------------------------------------------------------------------------------------------------------------------------------------------------------------------------------------------------------------------------------------------------------------------------------------------------------------------------------------------------------------------------------------------------------------------------------------------------------------------------------------------------------------------------------------------------------------------------------------------------------------------------------------------------------------------------------------------------------------------------------------------------------------------------------------------------------------------------------------------------------------------------------------------------------------------------------------------------------------------------------------------------------------------------------------------------------------------------------------------------------------------------------------------------------------------------------------------------------------------------------------------------------------------------------------------------------------------------------------------------------------------------------------------------------------------------------------------------------------------------------------------------------------------------------------------------------------------------------------------------------------------------------------------------------------------------------------------------------------------------------------------------------------------------------------------------------------------------------------------------------------------------------------------------------------------------------------------------------------------------------------------------------------------------------------------------------------------------------------------------------------------------------------------------------------------------------------------------------------------------|
| Review helpfulness | <ul style="list-style-type: none"> <li>• Review length is related to review helpfulness (Mudambi and Schuff 2010; Pan and Zhang 2011; Schindler and Bickart 2012)</li> <li>• Argument density and diversity are related to review helpfulness (Willemssen et al. 2011)</li> <li>• Non-evaluative statements are related to review helpfulness (Schindler and Bickart 2012)</li> <li>• The mix of objective product information and subjective evaluative statements is related to review helpfulness (Ghose and Ipeirotis 2006, 2011)</li> <li>• Review negativity is related to review helpfulness (Cao et al. 2011; Sen and Lerman 2007; Willemssen et al. 2011)</li> <li>• Review negativity is <i>not</i> related to review helpfulness (Wu 2013)</li> <li>• Review positivity is related to review helpfulness (Pan and Zhang 2011; Schindler and Bickart 2012)</li> <li>• Anxiety and anger are related to review helpfulness (Yin et al. 2014)</li> <li>• Review quality (accuracy and currency) is related to review helpfulness (Coursaris et al. 2018)</li> <li>• Review age is related to review helpfulness (Cao et al. 2011; Liu et al. 2008)</li> <li>• Review extremity is related to review helpfulness (Cao et al. 2011; Forman et al. 2008; Ghose and Ipeirotis 2011; Mudambi and Schuff 2010)</li> <li>• Linguistic style is related to review helpfulness (Cao et al. 2011; Li et al. 2019; Liu et al. 2008; Zhang and Varadarajan 2006)</li> <li>• Expressive slang and humor are related to review helpfulness (Schindler and Bickart 2012)</li> <li>• Readability is related to review helpfulness (Ghose and Ipeirotis 2011; Liu et al. 2008)</li> <li>• Spelling errors are related to review helpfulness (Ghose and Ipeirotis 2011; Schindler and Bickart 2012)</li> <li>• Availability of information on the reviewer is related to review helpfulness (Forman et al. 2008; Schindler and Bickart 2012)</li> <li>• Reviewer expertise (claims) and credibility are related to review helpfulness (Coursaris et al. 2018; Liu et al. 2008; Willemssen et al. 2011; Smith et al. 2005)</li> <li>• Expressed reviewer innovativeness is related to review helpfulness (Pan and Zhang 2011)</li> </ul> |
| Purchase intention | <ul style="list-style-type: none"> <li>• Review helpfulness is related to purchase intention (Coursaris et al. 2018)</li> <li>• Review quality (soundness, credibility, and fact-basedness of arguments) is linked to purchase intention (Lin et al. 2011)</li> </ul>                                                                                                                                                                                                                                                                                                                                                                                                                                                                                                                                                                                                                                                                                                                                                                                                                                                                                                                                                                                                                                                                                                                                                                                                                                                                                                                                                                                                                                                                                                                                                                                                                                                                                                                                                                                                                                                                                                                                                         |
| Sales              | <ul style="list-style-type: none"> <li>• Mix of objective product information and subjective evaluative statements is related to sales (Ghose and Ipeirotis 2011)</li> <li>• Availability of information on the reviewer is related to sales (Forman et al. 2008)</li> <li>• Textual content of reviews is related to sales (Archak et al. 2011)</li> </ul>                                                                                                                                                                                                                                                                                                                                                                                                                                                                                                                                                                                                                                                                                                                                                                                                                                                                                                                                                                                                                                                                                                                                                                                                                                                                                                                                                                                                                                                                                                                                                                                                                                                                                                                                                                                                                                                                   |
| Other              | <ul style="list-style-type: none"> <li>• Presence of sentiment scores in reviews is linked to speed of consumers' decision-making (Lak and Turetken 2017)</li> <li>• Content of reviews is linked to consumers' trust in sellers' benevolence and credibility (Pavlou and Dimoka 2006)</li> </ul>                                                                                                                                                                                                                                                                                                                                                                                                                                                                                                                                                                                                                                                                                                                                                                                                                                                                                                                                                                                                                                                                                                                                                                                                                                                                                                                                                                                                                                                                                                                                                                                                                                                                                                                                                                                                                                                                                                                             |

Table A1. Exemplary research on consequences of review properties (excluding research on consequences of review ratings)

| Domain                      | Conser-<br>vative<br>Share | Domain              | Conser-<br>vative<br>Share | Domain                | Conser-<br>vative<br>Share | Domain                 | Conser-<br>vative<br>Share |
|-----------------------------|----------------------------|---------------------|----------------------------|-----------------------|----------------------------|------------------------|----------------------------|
| timesofindia.indiatimes.com | 0.04                       | news.com.au         | 0.39                       | csmonitor.com         | 0.47                       | jsonline.com           | 0.61                       |
| economist.com               | 0.12                       | dailykos.com        | 0.39                       | realclearpolitics.com | 0.47                       | newsmax.com            | 0.61                       |
| northjersey.com             | 0.14                       | bloomberg.com       | 0.39                       | usatoday.com          | 0.47                       | factcheck.org          | 0.62                       |
| ocregister.com              | 0.15                       | dailyfinance.com    | 0.39                       | cnbc.com              | 0.47                       | reason.com             | 0.63                       |
| mercurynews.com             | 0.17                       | syracuse.com        | 0.39                       | dailymail.co.uk       | 0.47                       | washingtonexaminer.com | 0.63                       |
| nj.com                      | 0.17                       | usnews.com          | 0.39                       | mirror.co.uk          | 0.47                       | ecanadanow.com         | 0.63                       |
| sfgate.com                  | 0.19                       | timesunion.com      | 0.40                       | news.yahoo.com        | 0.47                       | americanthinker.com    | 0.65                       |
| baltimoresun.com            | 0.19                       | time.com            | 0.40                       | abcnews.go.com        | 0.48                       | twincities.com         | 0.67                       |
| courant.com                 | 0.22                       | reuters.com         | 0.41                       | upi.com               | 0.48                       | jacksonville.com       | 0.67                       |
| jpost.com                   | 0.25                       | telegraph.co.uk     | 0.41                       | chicagotribune.com    | 0.49                       | opposingviews.com      | 0.67                       |
| prnewswire.com              | 0.27                       | businessweek.com    | 0.42                       | ap.org                | 0.50                       | chron.com              | 0.67                       |
| sun-sentinel.com            | 0.27                       | cnn.com             | 0.42                       | nbcnews.com           | 0.50                       | startribune.com        | 0.68                       |
| nationalpost.com            | 0.28                       | politico.com        | 0.42                       | suntimes.com          | 0.51                       | breitbart.com          | 0.70                       |
| thestar.com                 | 0.28                       | theatlantic.com     | 0.42                       | freep.com             | 0.52                       | star-telegram.com      | 0.74                       |
| bbc.co.uk                   | 0.30                       | nationaljournal.com | 0.43                       | azcentral.com         | 0.53                       | stltoday.com           | 0.75                       |
| wickedlocal.com             | 0.30                       | alternet.org        | 0.43                       | tampabay.com          | 0.54                       | mysanantonio.com       | 0.77                       |
| nytimes.com                 | 0.31                       | ajc.com             | 0.44                       | orlandosentinel.com   | 0.54                       | denverpost.com         | 0.80                       |
| independent.co.uk           | 0.32                       | forbes.com          | 0.44                       | thehill.com           | 0.57                       | triblive.com           | 0.85                       |
| philly.com                  | 0.32                       | seattletimes.com    | 0.44                       | nationalreview.com    | 0.57                       | sltrib.com             | 0.85                       |
| hollywoodreporter.com       | 0.33                       | rawstory.com        | 0.44                       | news.sky.com          | 0.58                       | dallasnews.com         | 0.86                       |
| miamiherald.com             | 0.35                       | newsday.com         | 0.44                       | detroitnews.com       | 0.59                       | kansascity.com         | 0.93                       |
| huffingtonpost.com          | 0.35                       | cbsnews.com         | 0.45                       | express.co.uk         | 0.59                       | deseretnews.com        | 0.94                       |
| guardian.co.uk              | 0.37                       | rt.com              | 0.45                       | weeklystandard.com    | 0.59                       | topix.com              | 0.96                       |
| washingtonpost.com          | 0.37                       | theepochtimes.com   | 0.46                       | foxnews.com           | 0.59                       | knoxnews.com           | 0.96                       |
| online.wsj.com              | 0.39                       | latimes.com         | 0.47                       | washingtontimes.com   | 0.59                       | al.com                 | 1.00                       |

Table A2. List of news websites and conservative share (according to Flaxman et al. 2016)

## References for Online Appendix

- Archak N, Ghose A, Ipeirotis PG (2011) Deriving the Pricing Power of Product Features by Mining Consumer Reviews. *Manag Sci* 57(8):1485–1509.
- Cao Q, Duan W, Gan Q (2011) Exploring determinants of voting for the “helpfulness” of online user reviews: A text mining approach. *Decis Support Syst* 50(2):511–521.
- Coursaris CK, Van Osch W, Albini A (2018) Antecedents and Consequents of Information Usefulness in User-generated Online Reviews: A Multi-group Moderation Analysis of Review Valence. *AIS T Hum-Comput Interact* 10(1):1–25.
- Flaxman S, Goel S, Rao JM (2016) Filter bubbles, echo chambers, and online news consumption. *Public Opin Q* 80(S1):298–320.
- Forman C, Ghose A, Wiesenfeld B (2008) Examining the relationship between reviews and sales: The role of reviewer identity disclosure in electronic markets. *Inf Syst Res* 19(3):291–313.
- Ghose A, Ipeirotis PG (2006) Designing Ranking Systems for Consumer Reviews: The Impact of Review Subjectivity on Product Sales and Review Quality. In: *Proc 16th Annu Workshop Inf Technol Syst*, pp 303–310.
- Ghose A, Ipeirotis PG (2011) Estimating the Helpfulness and Economic Impact of Product Reviews: Mining Text and Reviewer Characteristics. *IEEE T Knowl Data Eng* 23(10):1498–1512.
- Lak P, Turetken O (2017) The Impact of Sentiment Analysis Output on Decision Outcomes: An Empirical Evaluation. *AIS T Hum Comput Interact* (9)1:1–22.
- Li ST, Pham TT, Chuang HC (2019) Do reviewers’ words affect predicting their helpfulness ratings? Locating helpful reviewers by linguistics styles. *Inf Manag* 56(1):28–38.
- Lin C-L, Lee S-H, Horng D-J (2011) The effects of online reviews on purchasing intention: The moderating role of need for cognition. *Soc Behav Pers: Int J* 39(1):71–81.
- Liu Y, Huang X, An A, Yu X (2008) Modeling and predicting the helpfulness of online reviews. In: *IEEE Int Conf Data Mining*, pp 443–452.
- Mudambi SM, Schuff D (2010) What Makes a Helpful Online Review? A Study of Customer Reviews on Amazon.com. *MIS Q* 34(1):185–200.
- Pan Y, Zhang JQ (2011) Born Unequal: A Study of the Helpfulness of User-Generated Product Reviews. *J Retail* 87(4):598–612.
- Pavlou PA, Dimoka A (2006) The Nature and Role of Feedback Text Comments in Online Marketplaces: Implications for Trust Building, Price Premiums, and Seller Differentiation. *Inf Syst Res* 17(4):392–414.
- Schindler RM, Bickart B (2012) Perceived helpfulness of online consumer reviews: The role of message content and style. *J Consumer Behav* 11:234–243.
- Sen S, Lerman D (2007) Why Are You Telling Me This? An Examination into Negative Consumer Reviews on the Web. *J Interact Mark* 21(4):76–94.
- Smith D, Menon S, Sivakumar K (2005) Online peer and editorial recommendations, trust, and choice in virtual markets. *J Interact Mark* 19(3):15–37.
- Willemsen LM, Neijens PC, Bronner F, De Ridder JA (2011) “Highly recommended!” The content characteristics and perceived usefulness of online consumer reviews. *J Computer-Mediated Comm* 17(1):19–38.
- Wu PF (2013) In Search of Negativity Bias: An Empirical Study of Perceived Helpfulness of Online Reviews. *Psychol Mark* 30(11):971–984.
- Yin D, Bond S, Zhang H (2014) Anxious or Angry? Effects of Discrete Emotions on the Perceived Helpfulness of Online Reviews. *MIS Q* 38(2):539–560.
- Zhang Z, Varadarajan B (2006) Utility scoring of product reviews. In: *Proc 15th ACM Int Conf Inf Knowl Manag*, pp 51–57.
